# Supplementary material for: New Insight into the Role of the Calvin Cycle: Reutilization of CO2 Emitted through Sugar Degradation
Source: PubMed Central journal article supplement (PMC4486974; doi:10.1038/srep11617), 2015-07-01
Supplement: srep11617-s1.pdf [file srep11617-s1.pdf]

## Supplementary Information

### **New insight into the Role of the Calvin cycle: Reutilization of CO<sub>2</sub> Emitted through Sugar Degradation**

Rie Shimizu<sup>1</sup>, Yudai Dempo<sup>2</sup>, Yasumune Nakayama<sup>2</sup>, Satoshi Nakamura<sup>1</sup>,  
Takeshi Bamba<sup>2</sup>, Eiichiro Fukusaki<sup>2</sup>, and Toshiaki Fukui<sup>1\*</sup>

*<sup>1</sup>Department of Bioengineering, Graduate School of Bioscience and Biotechnology, Tokyo Institute of Technology, 4259 Nagatsuta, Midori-ku, Yokohama 226-8501, Japan*

*<sup>2</sup>Department of Biotechnology, Graduate School of Engineering, Osaka University, 2-1 Yamadaoka, Suita, Osaka 565-0871, Japan*

\*Corresponding author

Mailing address: [tfukui@bio.titech.ac.jp](mailto:tfukui@bio.titech.ac.jp)

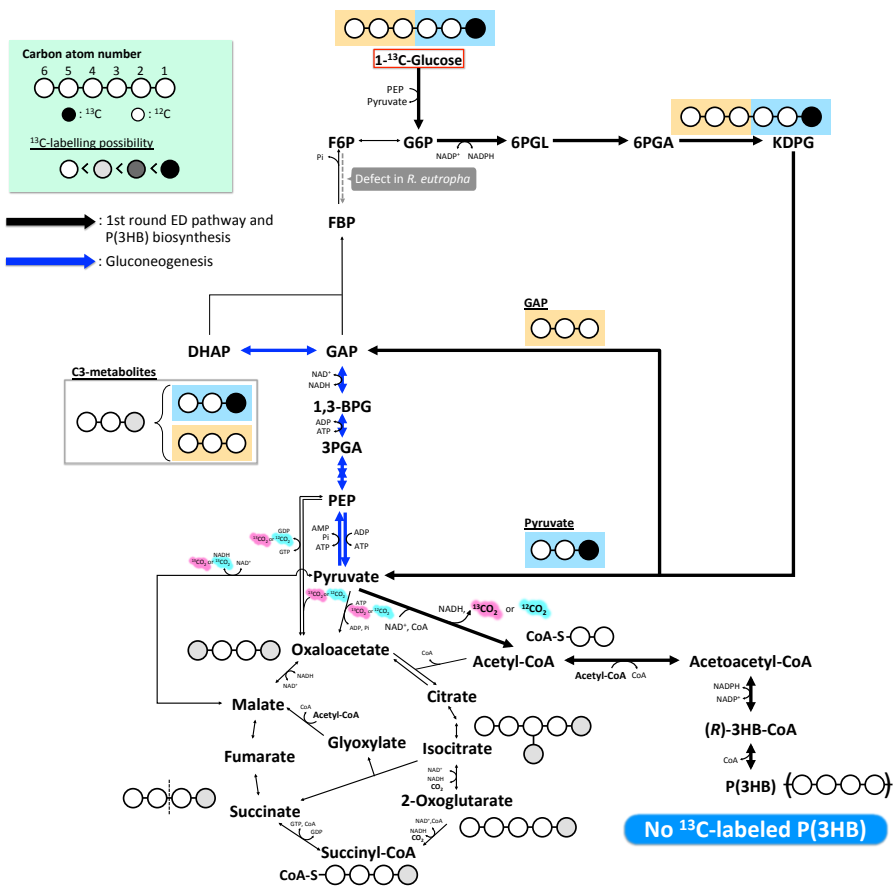

Fig. S1. Distribution of  $^{13}\text{C}$  derived from  $1\text{-}^{13}\text{C}_1$ -glucose via ED pathway, anaplerosis, and TCA cycles in *R. etrophia*

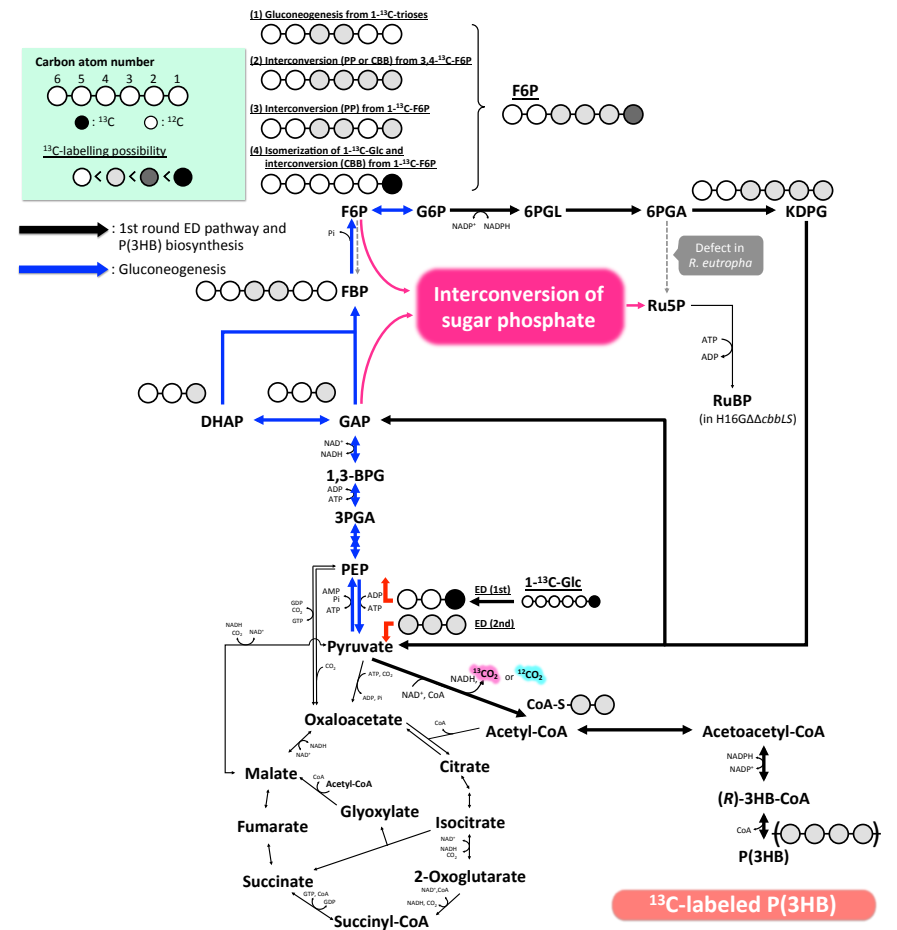

Fig. S2. Distribution of  $^{13}\text{C}$  derived from  $[1\text{-}^{13}\text{C}_1]$ -glucose via ED pathway in combination with gluconeogenesis and interconversion of sugar phosphates in PP and CBB cycles in *R. etrophia* H16GΔ*cbbR* and H16GΔ*cbbLS*

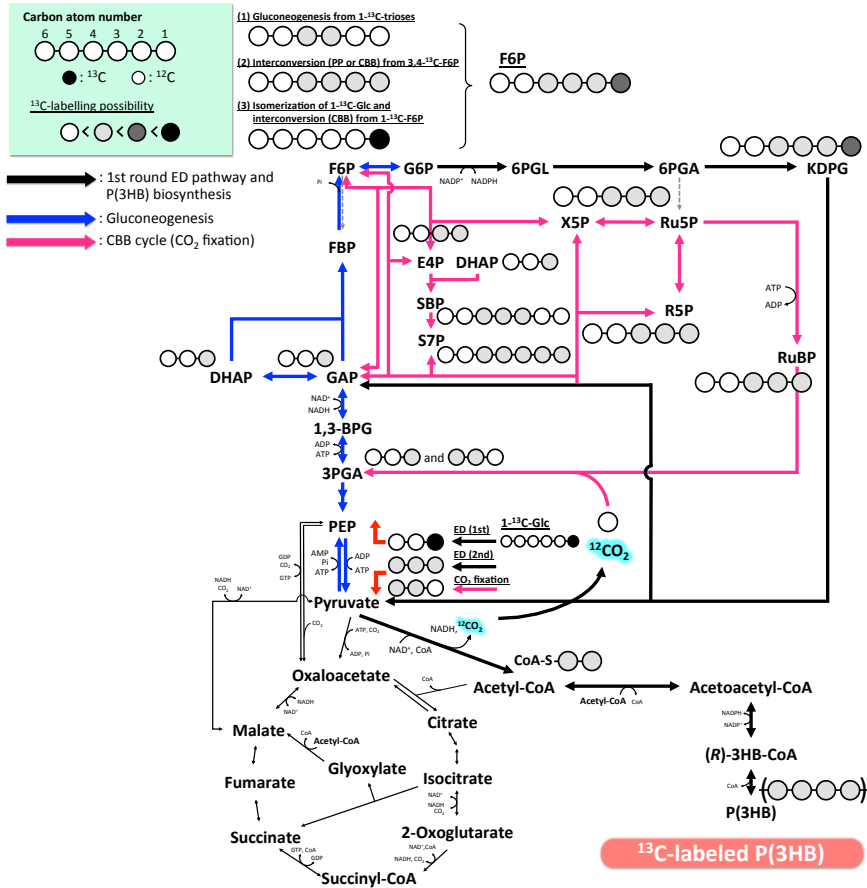

Fig. S3. Distribution of  $^{13}\text{C}$  derived from  $[1\text{-}^{13}\text{C}]$ -glucose via ED pathway in combination with gluconeogenesis, interconversion of sugar phosphates in CBB cycle and  $^{12}\text{CO}_2$  fixation in *R. eutropha* H16G

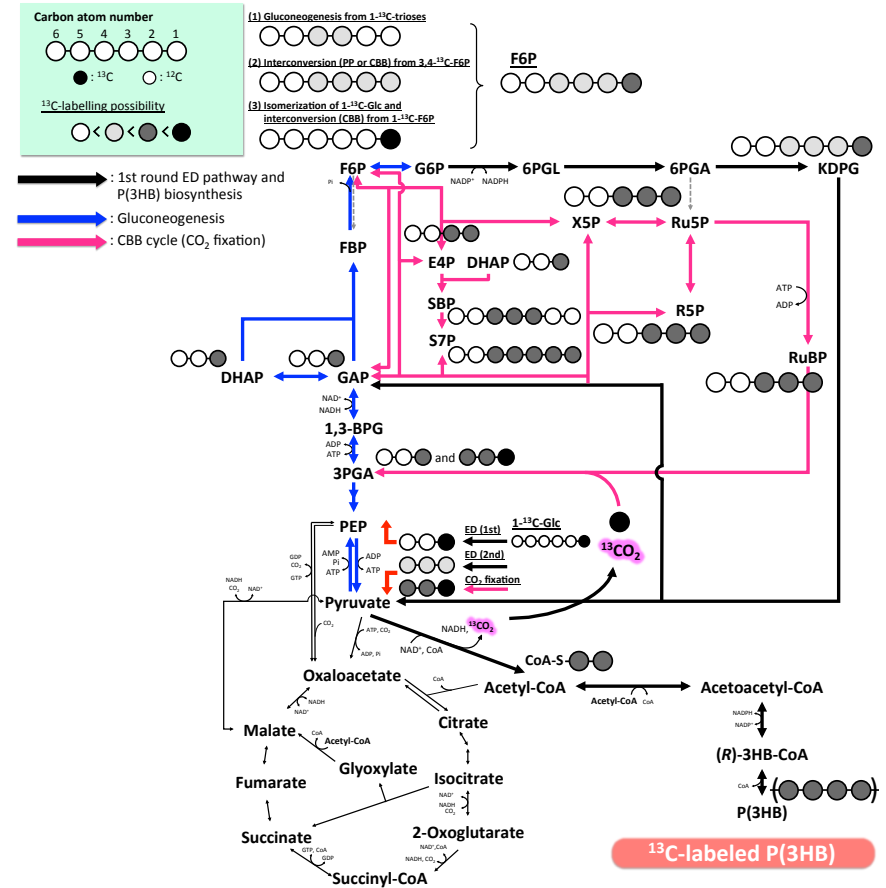

Fig. S4. Distribution of  $^{13}\text{C}$  derived from  $[1\text{-}^{13}\text{C}]$ -glucose via ED pathway in combination with gluconeogenesis, interconversion of sugar phosphates in CBB cycle and  $^{13}\text{CO}_2$  fixation in *R. eutropha* H16G

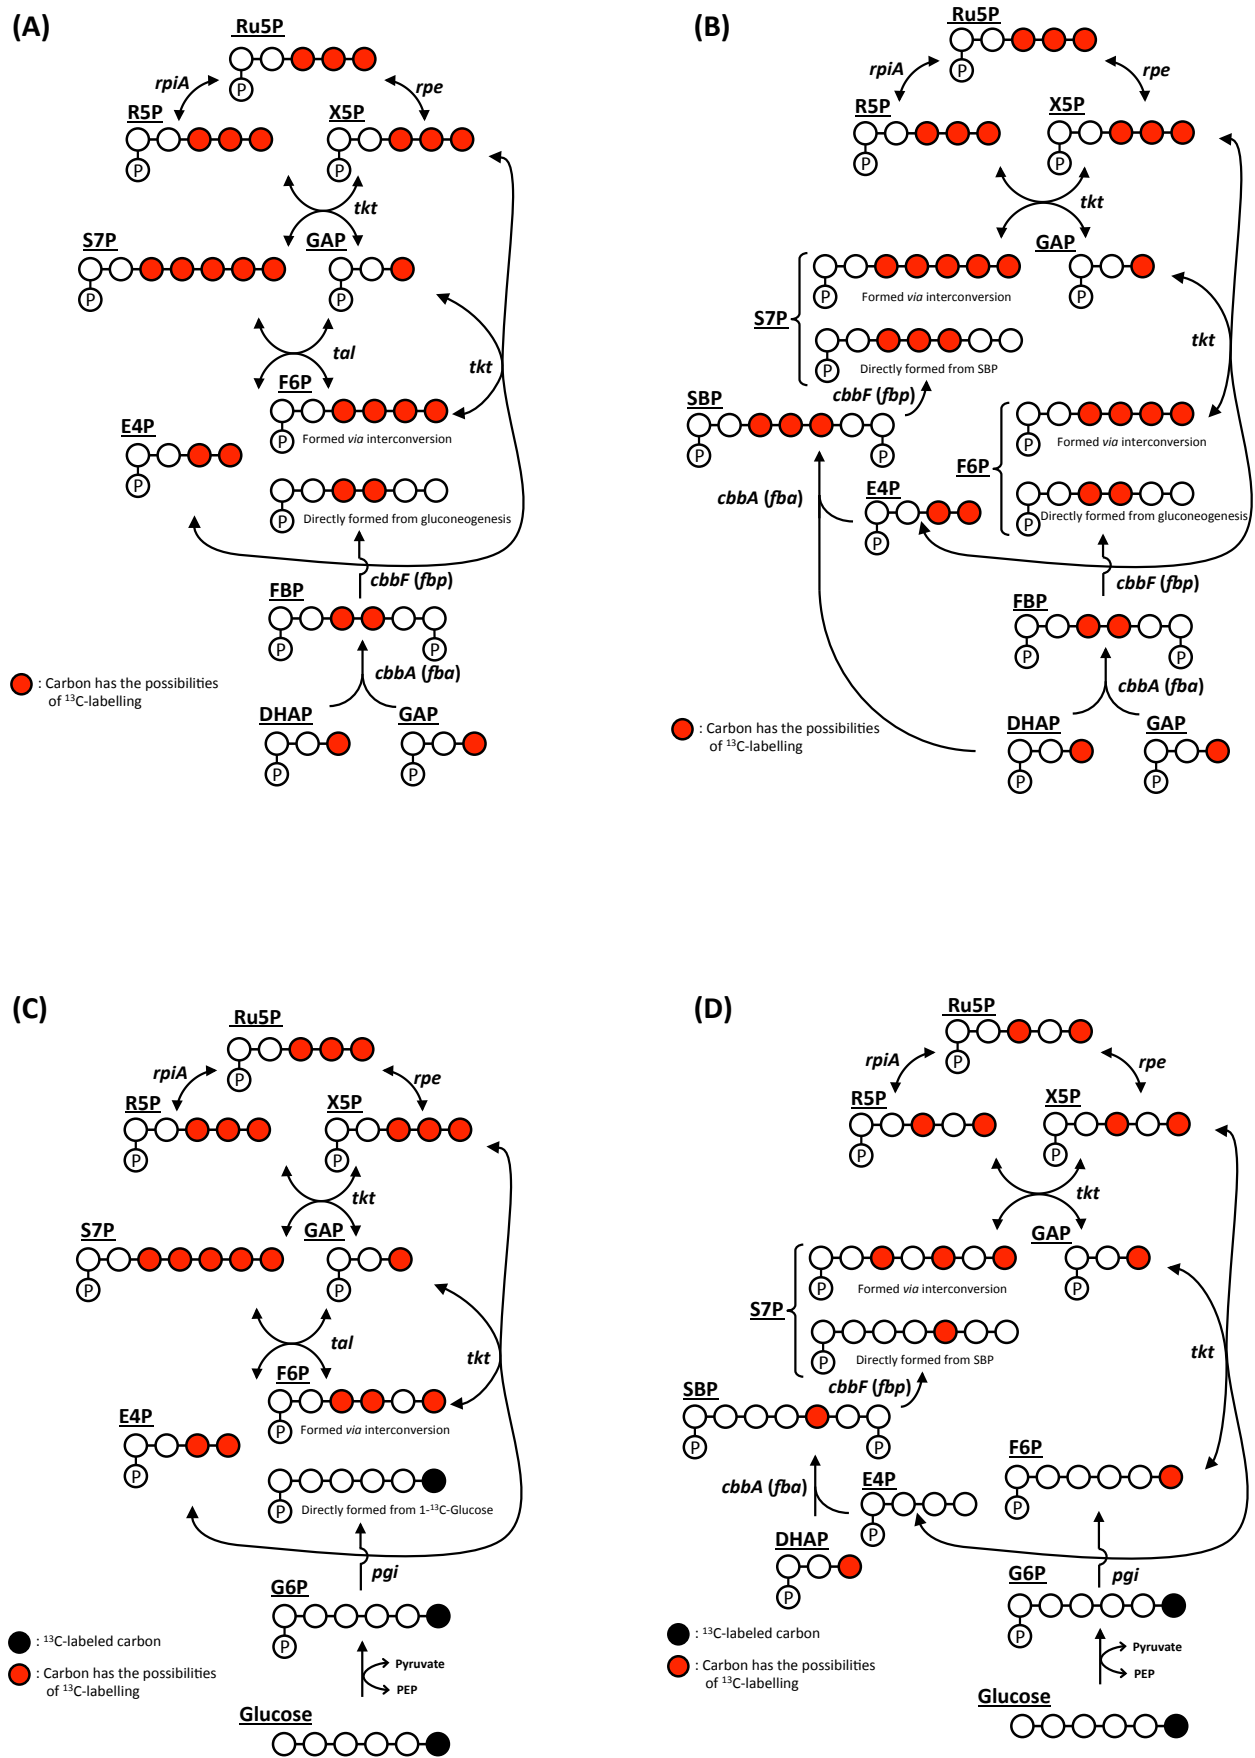

Fig. S5. Details of possible distribution of  $^{13}\text{C}$  derived from  $[1-^{13}\text{C}_1]$ -triose phosphates *via* gluconeogenesis and interconversion of sugar phosphate in PP pathway (A) and CBB cycle (B), and that of  $^{13}\text{C}$  derived from  $[1-^{13}\text{C}_1]$ -glucose *via* interconversion of sugar phosphates in PP pathway (C) and CBB cycle (D).

Table S1. Abbreviation of metabolites in this study.

| Name                                 | Abbreviation         |
|--------------------------------------|----------------------|
| ( <i>R</i> )-3-Hydroxybutyryl-CoA    | ( <i>R</i> )-3HB-CoA |
| 1,3-Bisphosphoglycerate              | 1,3-BPG              |
| 2-Keto-3-deoxygluconate-6-phosphate  | KDPG                 |
| 2-Oxoglutarate                       | 2-OG                 |
| 2-Phosphoglycerate                   | 2PGA                 |
| 3-Phosphoglycerate                   | 3PGA                 |
| 6-Phospho-1,5-gluconolactone         | 6PGL                 |
| 6-Phosphogluconate                   | 6PGA                 |
| $\alpha$ -Glycerophosphate           | $\alpha$ -GP         |
| Aspartate                            | Asp                  |
| Coenzyme A                           | CoA                  |
| Dihydroxyacetonephosphate            | DHAP                 |
| Erythrose-4-phosphate                | E4P                  |
| Fructose-1,6-bisphosphate            | FBP                  |
| Fructose-6-phosphate                 | F6P                  |
| Glucose-6-phosphate                  | G6P                  |
| Glutamate                            | Glu                  |
| Glyeraldehyde-3-phosphate            | GAP                  |
| Isoleucine                           | Ile                  |
| Leucine                              | Leu                  |
| Methionine                           | Met                  |
| Phenylalanine                        | Phe                  |
| Phosphoenol pyruvate                 | PEP                  |
| Phosphoribosyl pyrophosphate         | PRPP                 |
| Poly(( <i>R</i> )-3-hydroxybutyrate) | P(3HB)               |
| Ribose-5-phosphate                   | R5P                  |
| Ribulose-1,5-bisphosphate            | RuBP                 |
| Ribulose-5-phosphate                 | Ru5P                 |
| Sedoheptulose-1,7-bisphosphate       | SBP                  |
| Sedoheptulose-7-phosphate            | S7P                  |
| Serine                               | Ser                  |
| Threonine                            | Thr                  |
| Tyrosine                             | Tyr                  |

Table S2. Abundances of isotopomers in each metabolites in *R. eutropha* H16G and the CBB cycle-inactivated strains incubated on [1-<sup>13</sup>C<sub>1</sub>]-glucose.

| Metabolite | Number of <sup>13</sup> C ( <i>i</i> ) | H16G                                          |                                               | H16GΔ <i>cbbR</i>                             |                                               | H16GΔΔ <i>cbbLS</i>                           |                                               |
|------------|----------------------------------------|-----------------------------------------------|-----------------------------------------------|-----------------------------------------------|-----------------------------------------------|-----------------------------------------------|-----------------------------------------------|
|            |                                        | 2 h                                           | 12 h                                          | 2 h                                           | 12 h                                          | 2 h                                           | 12 h                                          |
| 2-OG       | 0                                      | 7.91×10 <sup>-1</sup> ± 1.80×10 <sup>-2</sup> | 6.40×10 <sup>-1</sup> ± 3.07×10 <sup>-2</sup> | 8.65×10 <sup>-1</sup> ± 1.22×10 <sup>-2</sup> | 8.22×10 <sup>-1</sup> ± 3.90×10 <sup>-2</sup> | 9.12×10 <sup>-1</sup> ± 5.64×10 <sup>-2</sup> | 8.69×10 <sup>-1</sup> ± 1.71×10 <sup>-2</sup> |
| 2-OG       | 1                                      | 1.87×10 <sup>-1</sup> ± 2.08×10 <sup>-2</sup> | 2.90×10 <sup>-1</sup> ± 1.82×10 <sup>-2</sup> | 1.29×10 <sup>-1</sup> ± 1.51×10 <sup>-2</sup> | 1.66×10 <sup>-1</sup> ± 3.14×10 <sup>-2</sup> | 8.79×10 <sup>-2</sup> ± 5.64×10 <sup>-2</sup> | 1.31×10 <sup>-1</sup> ± 1.71×10 <sup>-2</sup> |
| 2-OG       | 2                                      | 2.23×10 <sup>-2</sup> ± 8.85×10 <sup>-3</sup> | 6.99×10 <sup>-2</sup> ± 1.91×10 <sup>-2</sup> | 5.94×10 <sup>-3</sup> ± 7.20×10 <sup>-3</sup> | 1.21×10 <sup>-2</sup> ± 1.05×10 <sup>-2</sup> | 0 ± 0                                         | 0 ± 0                                         |
| 2-OG       | >3                                     | 0 ± 0                                         | 0 ± 0                                         | 0 ± 0                                         | 0 ± 0                                         | 0 ± 0                                         | 0 ± 0                                         |
| 3PGA       | 0                                      | 8.91×10 <sup>-1</sup> ± 6.59×10 <sup>-3</sup> | 8.88×10 <sup>-1</sup> ± 7.13×10 <sup>-3</sup> | 9.23×10 <sup>-1</sup> ± 4.83×10 <sup>-3</sup> | 9.23×10 <sup>-1</sup> ± 2.83×10 <sup>-3</sup> | 9.36×10 <sup>-1</sup> ± 1.72×10 <sup>-3</sup> | 9.43×10 <sup>-1</sup> ± 1.06×10 <sup>-3</sup> |
| 3PGA       | 1                                      | 8.20×10 <sup>-2</sup> ± 9.73×10 <sup>-3</sup> | 9.01×10 <sup>-2</sup> ± 6.57×10 <sup>-3</sup> | 6.18×10 <sup>-2</sup> ± 7.09×10 <sup>-3</sup> | 5.92×10 <sup>-2</sup> ± 1.27×10 <sup>-3</sup> | 4.79×10 <sup>-2</sup> ± 2.65×10 <sup>-4</sup> | 4.60×10 <sup>-2</sup> ± 2.03×10 <sup>-4</sup> |
| 3PGA       | 2                                      | 2.50×10 <sup>-2</sup> ± 4.12×10 <sup>-3</sup> | 2.05×10 <sup>-2</sup> ± 3.35×10 <sup>-4</sup> | 1.45×10 <sup>-2</sup> ± 2.20×10 <sup>-3</sup> | 1.66×10 <sup>-2</sup> ± 1.28×10 <sup>-3</sup> | 1.53×10 <sup>-2</sup> ± 1.90×10 <sup>-3</sup> | 1.02×10 <sup>-2</sup> ± 9.52×10 <sup>-4</sup> |
| 3PGA       | 3                                      | 2.01×10 <sup>-3</sup> ± 1.62×10 <sup>-3</sup> | 1.22×10 <sup>-3</sup> ± 4.92×10 <sup>-4</sup> | 9.14×10 <sup>-4</sup> ± 3.95×10 <sup>-4</sup> | 7.30×10 <sup>-4</sup> ± 7.91×10 <sup>-4</sup> | 1.00×10 <sup>-3</sup> ± 1.83×10 <sup>-4</sup> | 4.33×10 <sup>-4</sup> ± 7.34×10 <sup>-5</sup> |
| α-GP       | 0                                      | 8.95×10 <sup>-1</sup> ± 1.04×10 <sup>-2</sup> | 8.87×10 <sup>-1</sup> ± 1.80×10 <sup>-2</sup> | 9.32×10 <sup>-1</sup> ± 2.13×10 <sup>-3</sup> | 9.29×10 <sup>-1</sup> ± 1.50×10 <sup>-2</sup> | 9.45×10 <sup>-1</sup> ± 3.86×10 <sup>-3</sup> | 9.46×10 <sup>-1</sup> ± 7.92×10 <sup>-3</sup> |
| α-GP       | 1                                      | 1.05×10 <sup>-1</sup> ± 1.04×10 <sup>-2</sup> | 1.13×10 <sup>-1</sup> ± 1.80×10 <sup>-2</sup> | 6.83×10 <sup>-2</sup> ± 2.13×10 <sup>-3</sup> | 7.09×10 <sup>-2</sup> ± 1.50×10 <sup>-2</sup> | 5.54×10 <sup>-2</sup> ± 3.86×10 <sup>-3</sup> | 5.44×10 <sup>-2</sup> ± 7.92×10 <sup>-3</sup> |
| α-GP       | >2                                     | 0 ± 0                                         | 0 ± 0                                         | 0 ± 0                                         | 0 ± 0                                         | 0 ± 0                                         | 0 ± 0                                         |
| Asp        | 0                                      | 7.64×10 <sup>-1</sup> ± 4.13×10 <sup>-2</sup> | 7.01×10 <sup>-1</sup> ± 5.62×10 <sup>-2</sup> | 7.79×10 <sup>-1</sup> ± 5.11×10 <sup>-2</sup> | 6.66×10 <sup>-1</sup> ± 3.13×10 <sup>-2</sup> | 9.17×10 <sup>-1</sup> ± 1.02×10 <sup>-2</sup> | 8.38×10 <sup>-1</sup> ± 2.83×10 <sup>-2</sup> |
| Asp        | 1                                      | 2.08×10 <sup>-1</sup> ± 3.73×10 <sup>-2</sup> | 2.40×10 <sup>-1</sup> ± 3.42×10 <sup>-2</sup> | 2.03×10 <sup>-1</sup> ± 4.37×10 <sup>-2</sup> | 2.82×10 <sup>-1</sup> ± 3.77×10 <sup>-2</sup> | 7.34×10 <sup>-2</sup> ± 1.05×10 <sup>-2</sup> | 1.41×10 <sup>-1</sup> ± 2.00×10 <sup>-2</sup> |
| Asp        | 2                                      | 2.76×10 <sup>-2</sup> ± 1.01×10 <sup>-2</sup> | 5.95×10 <sup>-2</sup> ± 2.20×10 <sup>-2</sup> | 1.80×10 <sup>-2</sup> ± 1.43×10 <sup>-2</sup> | 5.22×10 <sup>-2</sup> ± 1.75×10 <sup>-2</sup> | 9.59×10 <sup>-3</sup> ± 3.45×10 <sup>-3</sup> | 2.08×10 <sup>-2</sup> ± 9.28×10 <sup>-3</sup> |
| Asp        | >3                                     | 0 ± 0                                         | 0 ± 0                                         | 0 ± 0                                         | 0 ± 0                                         | 0 ± 0                                         | 0 ± 0                                         |
| 1,3-BPG    | 0                                      | 8.65×10 <sup>-1</sup> ± 1.85×10 <sup>-2</sup> | 8.33×10 <sup>-1</sup> ± 2.57×10 <sup>-2</sup> | 9.04×10 <sup>-1</sup> ± 2.46×10 <sup>-2</sup> | 9.23×10 <sup>-1</sup> ± 4.96×10 <sup>-3</sup> | 9.42×10 <sup>-1</sup> ± 1.95×10 <sup>-3</sup> | 9.49×10 <sup>-1</sup> ± 3.71×10 <sup>-3</sup> |
| 1,3-BPG    | 1                                      | 1.05×10 <sup>-1</sup> ± 8.82×10 <sup>-3</sup> | 1.27×10 <sup>-1</sup> ± 1.45×10 <sup>-2</sup> | 6.91×10 <sup>-2</sup> ± 1.55×10 <sup>-2</sup> | 5.76×10 <sup>-2</sup> ± 5.09×10 <sup>-3</sup> | 4.44×10 <sup>-2</sup> ± 3.43×10 <sup>-3</sup> | 4.01×10 <sup>-2</sup> ± 2.65×10 <sup>-3</sup> |
| 1,3-BPG    | 2                                      | 2.77×10 <sup>-2</sup> ± 7.30×10 <sup>-3</sup> | 3.72×10 <sup>-2</sup> ± 1.04×10 <sup>-2</sup> | 2.36×10 <sup>-2</sup> ± 9.31×10 <sup>-3</sup> | 1.87×10 <sup>-2</sup> ± 1.07×10 <sup>-3</sup> | 1.36×10 <sup>-2</sup> ± 1.49×10 <sup>-3</sup> | 1.14×10 <sup>-2</sup> ± 1.06×10 <sup>-3</sup> |
| 1,3-BPG    | 3                                      | 2.43×10 <sup>-3</sup> ± 2.97×10 <sup>-3</sup> | 2.69×10 <sup>-3</sup> ± 8.69×10 <sup>-4</sup> | 3.48×10 <sup>-3</sup> ± 2.36×10 <sup>-3</sup> | 9.24×10 <sup>-4</sup> ± 6.60×10 <sup>-4</sup> | 0 ± 0                                         | 0 ± 0                                         |
| CoA        | 0                                      | 6.60×10 <sup>-1</sup> ± 4.58×10 <sup>-2</sup> | 4.83×10 <sup>-1</sup> ± 2.55×10 <sup>-2</sup> | 6.83×10 <sup>-1</sup> ± 1.65×10 <sup>-3</sup> | 5.83×10 <sup>-1</sup> ± 8.41×10 <sup>-3</sup> | 6.77×10 <sup>-1</sup> ± 1.00×10 <sup>-2</sup> | 5.99×10 <sup>-1</sup> ± 6.59×10 <sup>-3</sup> |
| CoA        | 1                                      | 2.33×10 <sup>-1</sup> ± 3.61×10 <sup>-2</sup> | 2.94×10 <sup>-1</sup> ± 7.82×10 <sup>-3</sup> | 2.08×10 <sup>-1</sup> ± 2.11×10 <sup>-3</sup> | 2.77×10 <sup>-1</sup> ± 1.14×10 <sup>-2</sup> | 2.18×10 <sup>-1</sup> ± 8.64×10 <sup>-3</sup> | 2.59×10 <sup>-1</sup> ± 7.09×10 <sup>-3</sup> |
| CoA        | 2                                      | 8.19×10 <sup>-2</sup> ± 8.13×10 <sup>-3</sup> | 1.37×10 <sup>-1</sup> ± 2.33×10 <sup>-2</sup> | 8.66×10 <sup>-2</sup> ± 5.56×10 <sup>-3</sup> | 1.08×10 <sup>-1</sup> ± 2.06×10 <sup>-3</sup> | 8.19×10 <sup>-2</sup> ± 2.38×10 <sup>-3</sup> | 1.07×10 <sup>-1</sup> ± 9.88×10 <sup>-3</sup> |
| CoA        | 3                                      | 1.92×10 <sup>-2</sup> ± 1.55×10 <sup>-3</sup> | 6.99×10 <sup>-2</sup> ± 1.91×10 <sup>-2</sup> | 1.95×10 <sup>-2</sup> ± 2.56×10 <sup>-3</sup> | 2.35×10 <sup>-2</sup> ± 6.77×10 <sup>-3</sup> | 1.95×10 <sup>-2</sup> ± 1.54×10 <sup>-3</sup> | 2.81×10 <sup>-2</sup> ± 2.03×10 <sup>-3</sup> |
| CoA        | 4                                      | 5.42×10 <sup>-3</sup> ± 1.09×10 <sup>-3</sup> | 1.66×10 <sup>-2</sup> ± 4.92×10 <sup>-3</sup> | 3.32×10 <sup>-3</sup> ± 4.08×10 <sup>-4</sup> | 8.28×10 <sup>-3</sup> ± 7.17×10 <sup>-3</sup> | 3.17×10 <sup>-3</sup> ± 7.35×10 <sup>-4</sup> | 5.53×10 <sup>-3</sup> ± 3.52×10 <sup>-3</sup> |
| CoA        | 5                                      | 0 ± 0                                         | 0 ± 0                                         | 0 ± 0                                         | 0 ± 0                                         | 5.71×10 <sup>-5</sup> ± 9.89×10 <sup>-5</sup> | 1.64×10 <sup>-3</sup> ± 3.86×10 <sup>-4</sup> |
| DHAP       | 0                                      | 9.00×10 <sup>-1</sup> ± 3.12×10 <sup>-3</sup> | 9.04×10 <sup>-1</sup> ± 7.97×10 <sup>-4</sup> | 9.20×10 <sup>-1</sup> ± 1.07×10 <sup>-2</sup> | 9.27×10 <sup>-1</sup> ± 4.71×10 <sup>-3</sup> | 9.47×10 <sup>-1</sup> ± 1.79×10 <sup>-3</sup> | 9.49×10 <sup>-1</sup> ± 9.13×10 <sup>-4</sup> |
| DHAP       | 1                                      | 8.45×10 <sup>-2</sup> ± 2.97×10 <sup>-3</sup> | 7.90×10 <sup>-2</sup> ± 9.38×10 <sup>-4</sup> | 6.78×10 <sup>-2</sup> ± 9.51×10 <sup>-3</sup> | 6.06×10 <sup>-2</sup> ± 3.31×10 <sup>-3</sup> | 4.49×10 <sup>-2</sup> ± 1.81×10 <sup>-3</sup> | 4.22×10 <sup>-2</sup> ± 1.78×10 <sup>-4</sup> |
| DHAP       | 2                                      | 1.50×10 <sup>-2</sup> ± 6.70×10 <sup>-4</sup> | 1.66×10 <sup>-2</sup> ± 6.89×10 <sup>-4</sup> | 1.15×10 <sup>-2</sup> ± 1.28×10 <sup>-3</sup> | 1.20×10 <sup>-2</sup> ± 1.44×10 <sup>-3</sup> | 7.97×10 <sup>-3</sup> ± 2.44×10 <sup>-4</sup> | 8.63×10 <sup>-3</sup> ± 8.40×10 <sup>-4</sup> |
| DHAP       | 3                                      | 3.66×10 <sup>-4</sup> ± 1.88×10 <sup>-4</sup> | 6.01×10 <sup>-4</sup> ± 1.29×10 <sup>-4</sup> | 2.66×10 <sup>-4</sup> ± 5.44×10 <sup>-5</sup> | 1.60×10 <sup>-4</sup> ± 1.17×10 <sup>-5</sup> | 0 ± 0                                         | 0 ± 0                                         |

Table S2. Continued.

| Metabolite | Number of $^{13}\text{C}$ ( <i>i</i> ) | H16G                                          |                                               | H16G $\Delta$ <i>cbbR</i>                     |                                               | H16G $\Delta$ <i>cbbLS</i>                    |                                               |
|------------|----------------------------------------|-----------------------------------------------|-----------------------------------------------|-----------------------------------------------|-----------------------------------------------|-----------------------------------------------|-----------------------------------------------|
|            |                                        | 2 h                                           | 12 h                                          | 2 h                                           | 12 h                                          | 2 h                                           | 12 h                                          |
| FBP        | 0                                      | $5.91 \times 10^{-1} \pm 2.07 \times 10^{-2}$ | $5.07 \times 10^{-1} \pm 1.65 \times 10^{-2}$ | $6.58 \times 10^{-1} \pm 4.12 \times 10^{-2}$ | $6.56 \times 10^{-1} \pm 3.12 \times 10^{-2}$ | $8.24 \times 10^{-1} \pm 1.29 \times 10^{-2}$ | $8.06 \times 10^{-1} \pm 8.63 \times 10^{-3}$ |
| FBP        | 1                                      | $2.05 \times 10^{-1} \pm 1.96 \times 10^{-2}$ | $2.48 \times 10^{-1} \pm 1.68 \times 10^{-2}$ | $1.96 \times 10^{-1} \pm 1.75 \times 10^{-2}$ | $1.90 \times 10^{-1} \pm 4.96 \times 10^{-3}$ | $1.13 \times 10^{-1} \pm 5.93 \times 10^{-3}$ | $1.17 \times 10^{-1} \pm 1.16 \times 10^{-2}$ |
| FBP        | 2                                      | $1.41 \times 10^{-1} \pm 3.10 \times 10^{-2}$ | $1.35 \times 10^{-1} \pm 2.10 \times 10^{-2}$ | $9.82 \times 10^{-2} \pm 2.09 \times 10^{-2}$ | $9.91 \times 10^{-2} \pm 2.32 \times 10^{-2}$ | $4.15 \times 10^{-2} \pm 1.96 \times 10^{-3}$ | $5.11 \times 10^{-2} \pm 4.99 \times 10^{-3}$ |
| FBP        | 3                                      | $6.37 \times 10^{-2} \pm 1.98 \times 10^{-2}$ | $1.10 \times 10^{-1} \pm 1.35 \times 10^{-2}$ | $4.82 \times 10^{-2} \pm 8.96 \times 10^{-3}$ | $5.52 \times 10^{-2} \pm 1.18 \times 10^{-2}$ | $2.08 \times 10^{-2} \pm 1.12 \times 10^{-2}$ | $2.60 \times 10^{-2} \pm 5.91 \times 10^{-3}$ |
| FBP        | >4                                     | 0 $\pm$ 0                                     | 0 $\pm$ 0                                     | 0 $\pm$ 0                                     | 0 $\pm$ 0                                     | 0 $\pm$ 0                                     | 0 $\pm$ 0                                     |
| Fumarate   | 0                                      | $7.37 \times 10^{-1} \pm 2.41 \times 10^{-2}$ | $6.15 \times 10^{-1} \pm 3.95 \times 10^{-3}$ | $7.86 \times 10^{-1} \pm 5.97 \times 10^{-2}$ | $7.21 \times 10^{-1} \pm 4.58 \times 10^{-2}$ | $8.29 \times 10^{-1} \pm 1.41 \times 10^{-2}$ | $7.81 \times 10^{-1} \pm 4.85 \times 10^{-3}$ |
| Fumarate   | 1                                      | $1.88 \times 10^{-1} \pm 2.59 \times 10^{-2}$ | $3.14 \times 10^{-1} \pm 1.10 \times 10^{-2}$ | $1.68 \times 10^{-1} \pm 4.01 \times 10^{-2}$ | $2.27 \times 10^{-1} \pm 3.04 \times 10^{-2}$ | $1.48 \times 10^{-1} \pm 9.21 \times 10^{-3}$ | $1.95 \times 10^{-1} \pm 7.34 \times 10^{-3}$ |
| Fumarate   | 2                                      | $7.53 \times 10^{-2} \pm 2.64 \times 10^{-2}$ | $7.07 \times 10^{-2} \pm 7.02 \times 10^{-3}$ | $4.59 \times 10^{-2} \pm 2.25 \times 10^{-2}$ | $5.20 \times 10^{-2} \pm 1.56 \times 10^{-2}$ | $2.28 \times 10^{-2} \pm 9.65 \times 10^{-3}$ | $2.41 \times 10^{-2} \pm 3.44 \times 10^{-3}$ |
| Fumarate   | >3                                     | 0 $\pm$ 0                                     | 0 $\pm$ 0                                     | 0 $\pm$ 0                                     | 0 $\pm$ 0                                     | 0 $\pm$ 0                                     | 0 $\pm$ 0                                     |
| Glu        | 0                                      | $8.62 \times 10^{-1} \pm 1.47 \times 10^{-2}$ | $6.60 \times 10^{-1} \pm 2.09 \times 10^{-2}$ | $8.99 \times 10^{-1} \pm 2.59 \times 10^{-2}$ | $8.08 \times 10^{-1} \pm 1.73 \times 10^{-3}$ | $8.89 \times 10^{-1} \pm 1.15 \times 10^{-2}$ | $8.71 \times 10^{-1} \pm 2.63 \times 10^{-2}$ |
| Glu        | 1                                      | $1.19 \times 10^{-1} \pm 2.02 \times 10^{-2}$ | $2.64 \times 10^{-1} \pm 1.94 \times 10^{-2}$ | $9.08 \times 10^{-2} \pm 2.35 \times 10^{-2}$ | $1.69 \times 10^{-1} \pm 2.73 \times 10^{-3}$ | $9.68 \times 10^{-2} \pm 3.64 \times 10^{-3}$ | $1.21 \times 10^{-1} \pm 2.45 \times 10^{-2}$ |
| Glu        | 2                                      | $1.83 \times 10^{-2} \pm 7.00 \times 10^{-3}$ | $7.61 \times 10^{-2} \pm 1.06 \times 10^{-2}$ | $1.05 \times 10^{-2} \pm 3.36 \times 10^{-3}$ | $2.28 \times 10^{-2} \pm 4.39 \times 10^{-3}$ | $1.46 \times 10^{-2} \pm 1.16 \times 10^{-2}$ | $7.99 \times 10^{-3} \pm 7.12 \times 10^{-3}$ |
| Glu        | >3                                     | 0 $\pm$ 0                                     | 0 $\pm$ 0                                     | 0 $\pm$ 0                                     | 0 $\pm$ 0                                     | 0 $\pm$ 0                                     | 0 $\pm$ 0                                     |
| Isocitrate | 0                                      | $7.69 \times 10^{-1} \pm 1.82 \times 10^{-2}$ | $6.45 \times 10^{-1} \pm 4.37 \times 10^{-2}$ | $8.07 \times 10^{-1} \pm 2.69 \times 10^{-2}$ | $7.85 \times 10^{-1} \pm 4.70 \times 10^{-2}$ | $7.81 \times 10^{-1} \pm 1.33 \times 10^{-2}$ | $7.33 \times 10^{-1} \pm 3.56 \times 10^{-2}$ |
| Isocitrate | 1                                      | $1.88 \times 10^{-1} \pm 1.49 \times 10^{-2}$ | $2.66 \times 10^{-1} \pm 2.95 \times 10^{-2}$ | $1.66 \times 10^{-1} \pm 2.22 \times 10^{-2}$ | $1.78 \times 10^{-1} \pm 3.41 \times 10^{-2}$ | $1.93 \times 10^{-1} \pm 1.05 \times 10^{-2}$ | $2.32 \times 10^{-1} \pm 3.09 \times 10^{-2}$ |
| Isocitrate | 2                                      | $3.99 \times 10^{-2} \pm 3.11 \times 10^{-3}$ | $7.57 \times 10^{-2} \pm 1.32 \times 10^{-2}$ | $2.59 \times 10^{-2} \pm 4.74 \times 10^{-3}$ | $3.49 \times 10^{-2} \pm 1.19 \times 10^{-2}$ | $2.62 \times 10^{-2} \pm 7.03 \times 10^{-3}$ | $3.46 \times 10^{-2} \pm 5.05 \times 10^{-3}$ |
| Isocitrate | 3                                      | $3.40 \times 10^{-3} \pm 1.42 \times 10^{-3}$ | $1.30 \times 10^{-2} \pm 1.12 \times 10^{-3}$ | $8.38 \times 10^{-4} \pm 5.57 \times 10^{-4}$ | $1.70 \times 10^{-3} \pm 1.23 \times 10^{-3}$ | 0 $\pm$ 0                                     | 0 $\pm$ 0                                     |
| Isocitrate | >4                                     | 0 $\pm$ 0                                     | 0 $\pm$ 0                                     | 0 $\pm$ 0                                     | 0 $\pm$ 0                                     | 0 $\pm$ 0                                     | 0 $\pm$ 0                                     |
| Ile        | 0                                      | $8.39 \times 10^{-1} \pm 1.92 \times 10^{-2}$ | $8.70 \times 10^{-1} \pm 3.92 \times 10^{-2}$ | $8.87 \times 10^{-1} \pm 2.70 \times 10^{-2}$ | $8.70 \times 10^{-1} \pm 4.03 \times 10^{-2}$ | $9.17 \times 10^{-1} \pm 4.23 \times 10^{-3}$ | $9.14 \times 10^{-1} \pm 1.81 \times 10^{-3}$ |
| Ile        | 1                                      | $1.61 \times 10^{-1} \pm 1.92 \times 10^{-2}$ | $1.30 \times 10^{-1} \pm 3.92 \times 10^{-2}$ | $1.13 \times 10^{-1} \pm 2.70 \times 10^{-2}$ | $1.30 \times 10^{-1} \pm 4.03 \times 10^{-2}$ | $7.25 \times 10^{-2} \pm 3.27 \times 10^{-3}$ | $7.45 \times 10^{-2} \pm 4.81 \times 10^{-3}$ |
| Ile        | 2                                      | 0 $\pm$ 0                                     | 0 $\pm$ 0                                     | 0 $\pm$ 0                                     | 0 $\pm$ 0                                     | $1.08 \times 10^{-2} \pm 1.05 \times 10^{-3}$ | $1.19 \times 10^{-2} \pm 3.00 \times 10^{-3}$ |
| Ile        | >3                                     | 0 $\pm$ 0                                     | 0 $\pm$ 0                                     | 0 $\pm$ 0                                     | 0 $\pm$ 0                                     | 0 $\pm$ 0                                     | 0 $\pm$ 0                                     |
| Leu        | 0                                      | $8.88 \times 10^{-1} \pm 1.82 \times 10^{-3}$ | $8.35 \times 10^{-1} \pm 2.17 \times 10^{-2}$ | $8.86 \times 10^{-1} \pm 2.90 \times 10^{-2}$ | $8.84 \times 10^{-1} \pm 1.43 \times 10^{-3}$ | $9.08 \times 10^{-1} \pm 1.99 \times 10^{-3}$ | $8.96 \times 10^{-1} \pm 1.81 \times 10^{-2}$ |
| Leu        | 1                                      | $1.02 \times 10^{-1} \pm 2.51 \times 10^{-3}$ | $1.22 \times 10^{-1} \pm 1.62 \times 10^{-2}$ | $1.07 \times 10^{-1} \pm 2.77 \times 10^{-2}$ | $1.02 \times 10^{-1} \pm 3.56 \times 10^{-3}$ | $7.86 \times 10^{-2} \pm 3.86 \times 10^{-3}$ | $9.07 \times 10^{-2} \pm 1.54 \times 10^{-2}$ |
| Leu        | 2                                      | $9.64 \times 10^{-3} \pm 1.66 \times 10^{-3}$ | $2.11 \times 10^{-2} \pm 2.69 \times 10^{-3}$ | $7.80 \times 10^{-3} \pm 1.48 \times 10^{-3}$ | $1.42 \times 10^{-2} \pm 2.48 \times 10^{-3}$ | $1.36 \times 10^{-2} \pm 2.45 \times 10^{-3}$ | $1.34 \times 10^{-2} \pm 2.66 \times 10^{-3}$ |
| Leu        | 3                                      | 0 $\pm$ 0                                     | $2.21 \times 10^{-2} \pm 3.55 \times 10^{-3}$ | 0 $\pm$ 0                                     | 0 $\pm$ 0                                     | 0 $\pm$ 0                                     | 0 $\pm$ 0                                     |
| Leu        | >4                                     | 0 $\pm$ 0                                     | 0 $\pm$ 0                                     | 0 $\pm$ 0                                     | 0 $\pm$ 0                                     | 0 $\pm$ 0                                     | 0 $\pm$ 0                                     |
| Malate     | 0                                      | $7.79 \times 10^{-1} \pm 1.09 \times 10^{-2}$ | $6.66 \times 10^{-1} \pm 1.03 \times 10^{-1}$ | $8.11 \times 10^{-1} \pm 1.74 \times 10^{-2}$ | $7.24 \times 10^{-1} \pm 1.69 \times 10^{-2}$ | $8.43 \times 10^{-1} \pm 7.41 \times 10^{-3}$ | $8.29 \times 10^{-1} \pm 9.90 \times 10^{-3}$ |
| Malate     | 1                                      | $1.80 \times 10^{-1} \pm 9.36 \times 10^{-3}$ | $2.68 \times 10^{-1} \pm 8.32 \times 10^{-2}$ | $1.59 \times 10^{-1} \pm 1.57 \times 10^{-2}$ | $2.22 \times 10^{-1} \pm 1.35 \times 10^{-2}$ | $1.39 \times 10^{-1} \pm 6.38 \times 10^{-3}$ | $1.53 \times 10^{-1} \pm 8.28 \times 10^{-3}$ |
| Malate     | 2                                      | $3.65 \times 10^{-2} \pm 8.14 \times 10^{-4}$ | $5.93 \times 10^{-2} \pm 1.93 \times 10^{-2}$ | $2.78 \times 10^{-2} \pm 2.10 \times 10^{-3}$ | $5.04 \times 10^{-2} \pm 3.64 \times 10^{-3}$ | $1.64 \times 10^{-2} \pm 9.60 \times 10^{-4}$ | $1.63 \times 10^{-2} \pm 1.52 \times 10^{-3}$ |
| Malate     | 3                                      | $3.69 \times 10^{-3} \pm 8.35 \times 10^{-4}$ | $6.39 \times 10^{-3} \pm 1.57 \times 10^{-3}$ | $2.32 \times 10^{-3} \pm 2.46 \times 10^{-4}$ | $3.70 \times 10^{-3} \pm 3.88 \times 10^{-4}$ | $1.40 \times 10^{-3} \pm 4.88 \times 10^{-4}$ | $1.79 \times 10^{-3} \pm 3.06 \times 10^{-4}$ |
| Malate     | 4                                      | $6.09 \times 10^{-4} \pm 1.54 \times 10^{-4}$ | $6.43 \times 10^{-4} \pm 1.24 \times 10^{-4}$ | $3.36 \times 10^{-4} \pm 1.10 \times 10^{-4}$ | $3.31 \times 10^{-4} \pm 3.03 \times 10^{-4}$ | $5.27 \times 10^{-5} \pm 3.39 \times 10^{-5}$ | $2.76 \times 10^{-5} \pm 2.14 \times 10^{-5}$ |







The abbreviations are shown in Table S1.

$m_i$  represents the abundance of each isotopomer of the metabolites in which  $i$   $^{13}\text{C}$  atoms are incorporated, calculated by following equation:

$$m_i = \frac{M_i}{\sum_{j=0}^n M_j}$$

where  $M_i$  represents the peak intensity of each the isotopomer.

The results shown in grey (S7P, R5P, Isocitrate) were unreliable due to coelution of unknown contaminants.

Table S3. Primers used in qRT-PCR analysis.

| Name          | Sequence             | Amplification size |
|---------------|----------------------|--------------------|
| bfr2-5'       | CGCGATCAACCAGTATTTCC | 228 bp             |
| bfr2-3'       | GTCTGCTCCAGCTTCAGGTC |                    |
| cbbL-F-RT-PCR | TCCACCGGCATCATCGT    | 218 bp             |
| cbbL-R-RT-PCR | GCGTCCATCACGAACAGGAA |                    |
| cbbP-F-RT-PCR | GCGCACCGGCAATATGAA   | 218 bp             |
| cbbP-R-RT-PCR | GGCCCTCGTAGAACAGCAGA |                    |
| cbbF-F-RT-PCR | ATGGAGGCGCCTTACCAGA  | 227 bp             |
| cbbF-R-RT-PCR | ATGGTGGTGGGACCGTAGAG |                    |

Table S4. MRM transition in this study.

| Metabolite            | RT <sup>a</sup> | MRM                                                                                                                                                                                 | CE <sup>b</sup> |
|-----------------------|-----------------|-------------------------------------------------------------------------------------------------------------------------------------------------------------------------------------|-----------------|
| Ser                   | 1.14            | 104>74.1, 105>74.1, 105>75.1, 106>75.1, 106>76.1, 107>76.1                                                                                                                          | 16              |
| Thr                   | 1.17            | 118>74.05, 119>74.05, 119>75.05, 120>74.05, 120>75.05,<br>120>76.05, 121>75.05, 121>76.05, 122>76.05                                                                                | 16              |
| Met                   | 1.79            | 148>47.05, 149>47.05, 149>48.05, 150>47.05, 150>48.05, 151>47.05, 151>48.05<br>152>47.05, 152>48.05, 153>48.05                                                                      | 14              |
| Tyr                   | 2.32            | 180>163.05, 181>164.05, 182>165.05, 183>166.05, 184>167.05<br>185>168.05, 186>169.05, 187>170.05, 188>171.05, 189>172.05                                                            | 18              |
| Ile                   | 2.34            | 190.1>130.1, 191.1>131.1, 192.1>132.1, 193.1>133.1, 194.1>134.1, 195.1>135.1,<br>196.1>136.1                                                                                        | 10              |
| Leu                   | 2.56            | 190.1>130.1, 191.1>131.1, 192.1>132.1, 193.1>133.1, 194.1>134.1, 195.1>135.1,<br>196.1>136.1                                                                                        | 10              |
| Phe                   | 3.84            | 164>147, 165>148, 166>149, 167>150, 168>151, 169>152, 170>153, 171>154,<br>172>155, 173>156                                                                                         | 18              |
| Glu                   | 3.89            | 146>128.05, 147>129.05, 148>130.05, 149>131.05, 150>132.05, 151>133.05                                                                                                              | 17              |
| Asp                   | 3.93            | 132>115.1, 133>116.1, 134>117.1, 135>118.1 136>119.1                                                                                                                                | 16              |
| R5P                   | 5.16            | 229.05>79.05, 230.05>79.05, 231.05>79.05, 232.05>79.05, 233.05>79.05,<br>234.05>79.05                                                                                               | 47              |
| S7P                   | 5.39            | 289>97, 290>97, 291>97, 292>97, 293>97, 294>97, 295>97, 296>97                                                                                                                      | 23              |
| α-GP                  | 5.76            | 171.1>79.05, 172.1>79.05, 173.1>79.05, 174.1>79.05                                                                                                                                  | 18              |
| Ru5P                  | 6.49            | 229.05>79.05, 230.05>79.05, 231.05>79.05, 232.05>79.05, 233.05>79.05,<br>234.05>79.05                                                                                               | 47              |
| DHAP                  | 7.20            | 169>97.05, 170>97.05, 171>97.05, 172>97.05                                                                                                                                          | 12              |
| Succinate             | 8.80            | 117>73.1, 118>73.1, 118>74.1, 119>74.1, 119>75.1, 120>75.1, 120>76.1, 121>76.1                                                                                                      | 15              |
| Malate                | 9.29            | 133>115.1, 134>116.1, 135>117.1, 136>118.1, 137>119.1                                                                                                                               | 17              |
| 2-OG                  | 9.59            | 145>101, 146>101, 146>102, 147>102, 147>103, 148>103, 148>104, 149>104,<br>149>105, 150>105                                                                                         | 10              |
| Fumarate              | 9.75            | 175>115, 176>116, 177>117, 178>118, 179>119                                                                                                                                         | 10              |
| 3PGA                  | 9.78            | 185>79.05, 186>79.05, 187>79.05, 188>79.05                                                                                                                                          | 32              |
| FBP                   | 9.95            | 339>97.05, 340>97.05, 341>97.05, 342>97.05, 343>97.05, 344>97.05, 345>97.05                                                                                                         | 18              |
| Citrate + Isocitrate* | 10.04           | 191>111.1, 192>111.1, 192>112.1, 193>112.1, 193>113.1, 194>113.1, 194>114.1,<br>195>114.1, 195>115.1, 196>115.1, 196>116.1, 197>116.1                                               | 15              |
| RuBP                  | 10.09           | 309>97.05, 310>97.05, 311>97.05, 312>97.05, 313>97.05, 314>97.05                                                                                                                    | 18              |
| PEP                   | 10.10           | 167>79.1, 168>79.1, 169>79.1, 170>79.1                                                                                                                                              | 13              |
| PRPP                  | 11.19           | 389>177.05, 390>177.05, 391>177.05, 392>177.05, 393>177.05, 394>177.05                                                                                                              | 21              |
| 1,3-BPG               | 11.20           | 265>167.05, 266>168.05, 267>169.05, 268>170.05                                                                                                                                      | 18              |
| CoA                   | 11.99           | 766>79, 767>79, 768>79, 769>79, 770>79, 771>79, 772>79, 773>79, 774>79,<br>775>79, 776>79, 777>79<br>778>79, 779>79, 780>79, 781>79, 782>79, 783>79, 784>79, 785>79, 786>79, 787>79 | 54              |
| 3HB-CoA               | 12.09           | 852.1>408.1, 853.1>408.1, 854.1>408.1, 855.1>408.1, 856.1>408.1                                                                                                                     | 40              |
| Acetyl-CoA            | 12.25           | 808.1>408.1, 809.1>408.1, 810.1>408.1                                                                                                                                               | 37              |
| Succinyl-CoA          | 12.30           | 866.1>408.1, 867.1>408.1, 868.1>408.1, 869.1>408.1, 870.1>408.1                                                                                                                     | 41              |
| Crotonyl-CoA          | 13.24           | 834.1>408.1, 835.1>408.1, 836.1>408.1, 837.1>408.1, 838.1>408.1                                                                                                                     | 36              |
| Butyryl-CoA           | 13.34           | 836.1>408.1, 837.1>408.1, 838.1>408.1, 839.1>408.1, 840.1>408.1                                                                                                                     | 37              |

<sup>a</sup>RT: retention time (min); <sup>b</sup>CE: collision energy (V).

\*Could not be discriminated.
